# Supplementary material for: Phenylboronate-diol crosslinked glycopolymeric nanocarriers for insulin delivery at physiological pH
Source: Royal Society of Chemistry journal article supplement (doi:10.1039/c3sm52485j), 2013-11-19
Supplement: c3sm52485j.pdf [file c3sm52485j.pdf]

## Supporting Information for

# Phenylboronate-Diol Crosslinked Glycopolymetric Nanocarriers for Insulin Delivery at Physiological pH

Qianqian Guo,<sup>1</sup> Zhongming Wu,<sup>2</sup> Xinge Zhang,<sup>\*,1</sup> Lei Sun,<sup>1</sup> Chaoxing Li<sup>\*,1</sup>

<sup>1</sup> Key Laboratory of Functional Polymer Materials of Ministry Education, Institute of Polymer Chemistry, Nankai University, Tianjin 300071, China

<sup>2</sup> 2011 Collaborative Innovation Center of Tianjin for Medical Epigenetics, Key Laboratory of Hormones and Development (Ministry of Health), Metabolic Diseases Hospital, Tianjin Medical University, Tianjin 300070, China.

As shown in Figure S1, pH increased slowly and then increased quickly with the addition of NaOH solution. pAAPBA moieties ionized gradually as the pH increased, and when pH is above 7.5, pAAPBA segments ionized mostly completely, and the pH increased rapidly in the range from 7.5 to 8.4 with the increasing amount of NaOH added in the solution. Additionally, when in acidic pH, the micelles were inclined to aggregation and precipitation was observed at pH 6.0, so the acidic pH was not considered in the measurement.

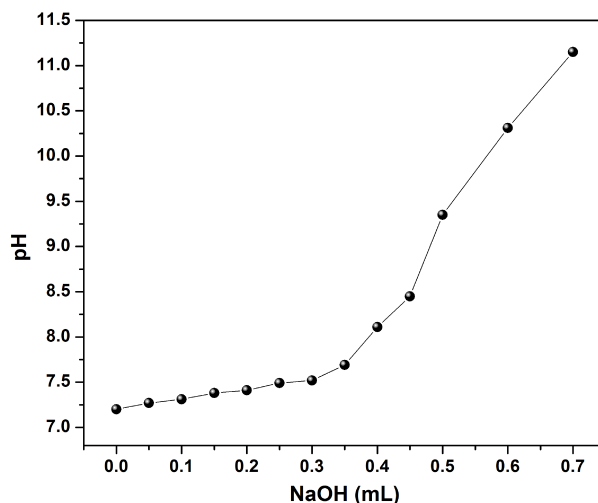

Figure S1. The pH as a function of the volume of NaOH (0.05 mol/L) added in 5 mL p(AAPBA4-*b*-GAMA1) micelles solution at 25 °C, where micelle solution had initial polymer concentration of 0.60 mg/ml.
